# Supplementary material for: Gaps and opportunities in refractory status epilepticus research in children: A multi-center approach by the Pediatric Status Epilepticus Research Group (pSERG)
Source: PubMed Central journal article supplement — Seizure. Author manuscript; Available in PMC 2019 Feb 24. (PMC6387832; doi:10.1016/j.seizure.2013.10.004), 2013-10-16
Supplement: NIHMS1505989-supplement-Fig_1.pdf [file NIHMS1505989-supplement-Fig_1.pdf]

## ABCs

### Manage:

Hypoxia

Hemodynamics

Hyperthermia

Hypoglycemia

Hyponatremia

**First AED: LZP** 0.1 mg/kg IV (Max 5 mg over 1-4 min)  
If no IV: **DZP** 0.2-0.5 mg/kg/dose PR (Max. 20 mg/dose)  
Alternative: Intramuscular or Intranasal **Midazolam**

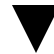

**Second AED: FPHT** 20 mg PE/kg IV  
(If no **FPHT**: **PHT** 20 mg/kg IV)

Labs  
EKG  
Imaging

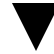

**Third AED: PB** 20 mg/kg IV  
Or: **LEV**, **VPA**, and others

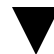

**MDZ** 0.1-0.3 mg/kg bolus  
or **PTB** 3-15 mg/kg bolus  
followed by CI to maintain seizure-suppression

EEG  
Monitoring
