# Supplementary material for: Gaps and opportunities in refractory status epilepticus research in children: A multi-center approach by the Pediatric Status Epilepticus Research Group (pSERG)
Source: PubMed Central journal article supplement — Seizure. Author manuscript; Available in PMC 2019 Feb 24. (PMC6387832; doi:10.1016/j.seizure.2013.10.004), 2013-10-16
Supplement: NIHMS1505989-supplement-Table1.pdf [file NIHMS1505989-supplement-Table1.pdf]

**Supplementary Table 1. Participating institutions and their principal investigators at each site**

| <b>Hospital</b>                                | <b>University</b>                                             | <b>Site investigators</b>                                                              |
|------------------------------------------------|---------------------------------------------------------------|----------------------------------------------------------------------------------------|
| Ann & Robert Lurie's Children's Hospital       | Northwestern University                                       | Joshua Goldstein                                                                       |
| Boston Children's Hospital                     | Harvard University                                            | Tobias Loddenkemper<br>Iván Sánchez Fernández<br>Robert C. Tasker                      |
| Children's Hospital Colorado                   | University of Colorado                                        | Kevin E. Chapman                                                                       |
| Children's National Medical Center             | George Washington University                                  | Jessica Carpenter<br>Nathan Dean<br>William Gaillard                                   |
| Cincinnati Children's Hospital Medical Center  | University of Cincinnati                                      | Ravindra Arya<br>Tracy Glauser<br>Katrina Peariso<br>John Pestian (Bio-informatics)    |
| Duke Children's Hospital                       | Duke University                                               | Mohamad Mikati<br>Margie Ream<br>David Goldstein (Genetics)<br>Erin Heinzen (Genetics) |
| Langone Medical Center                         | New York University                                           | James J. Riviello, Jr.                                                                 |
| Phoenix Children's Hospital                    | University of Arizona                                         | Korwyn Williams                                                                        |
| Texas Children's Hospital                      | Baylor University                                             | Satish Agadi                                                                           |
| The Children's Hospital of Philadelphia        | Perelman School of Medicine at the University of Pennsylvania | Nicholas S. Abend<br>Alexis Topjian                                                    |
| The Hospital for Sick Children                 | University of Toronto                                         | Cecil Hahn                                                                             |
| The University of Virginia Children's Hospital | University of Virginia                                        | Howard Goodkin<br>Melissa Sacco                                                        |
