# Supplementary figures and images for: Gaps and opportunities in refractory status epilepticus research in children: A multi-center approach by the Pediatric Status Epilepticus Research Group (pSERG)
Source: PubMed Central journal article supplement — Seizure. Author manuscript; Available in PMC 2019 Feb 24. (PMC6387832; doi:10.1016/j.seizure.2013.10.004), 2013-10-16

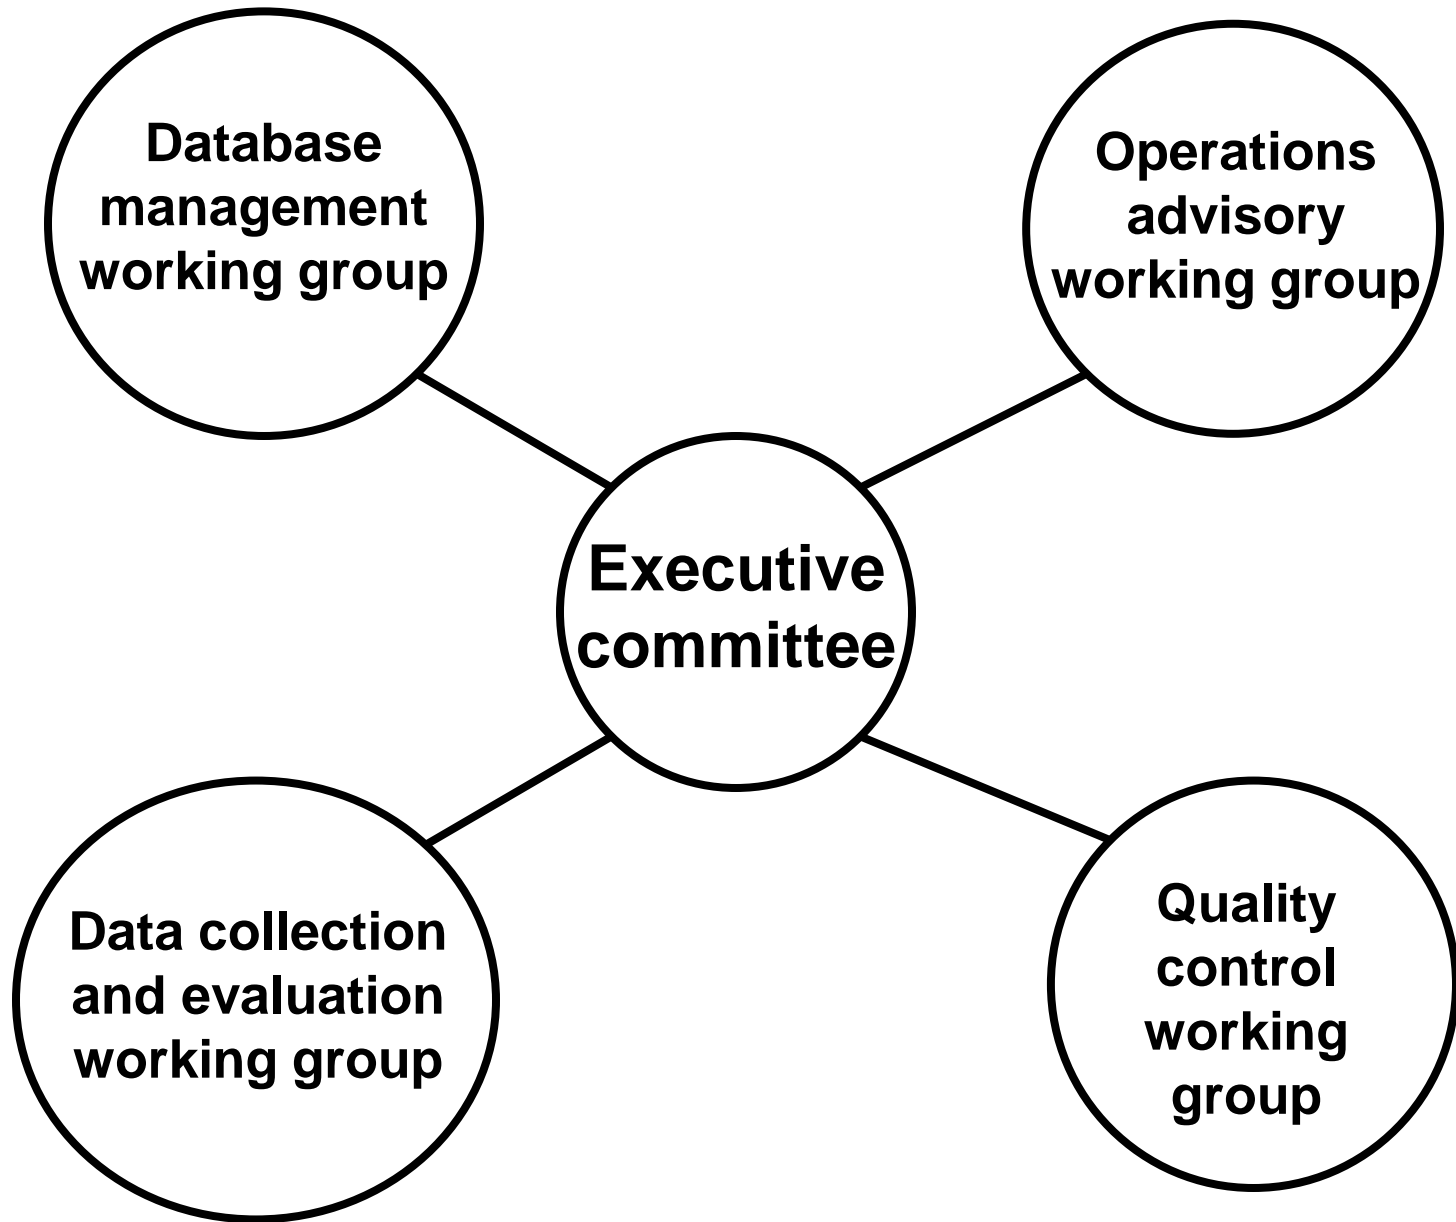

Supplement: NIHMS1505989-supplement-Fig_2.pdf [file NIHMS1505989-supplement-Fig_2.pdf]
